# Supplementary material
Source: HighWire-hosted journal article supplement (https://spcare.bmj.com/content/bmjspcare-2020-002797)
Supplement: inline-supplementary-material-1 [file inline-supplementary-material-1.pdf]

**SUPPLEMENTARY TABLES:****Table S1. Online Bridging Program Modules and Learning Objectives.**

| <b>Module:</b>                                                           | <b>Learning Objectives:</b><br><i>By the end of the module, the learner should be able to:</i>                                                                                                                                                                                                                                                                                                                                                                                                                                                 |
|--------------------------------------------------------------------------|------------------------------------------------------------------------------------------------------------------------------------------------------------------------------------------------------------------------------------------------------------------------------------------------------------------------------------------------------------------------------------------------------------------------------------------------------------------------------------------------------------------------------------------------|
| 1. Settlement in Canada, including settling during the COVID-19 pandemic | <ul style="list-style-type: none"> <li>• Outline essential steps for settlement in Canada that IMGs must take upon arrival</li> <li>• Enumerate some of the common challenges IMGs encounter during their first few weeks in Canada</li> <li>• Describe how the policies surrounding travel during COVID-19 affect the settlement of incoming IMGs</li> </ul>                                                                                                                                                                                  |
| 2. Canadian Health Care System and Palliative Care Delivery in Canada    | <ul style="list-style-type: none"> <li>• Describe the health care system in Canada</li> <li>• Describe Palliative and Psychosocial Services in Toronto</li> <li>• Describe Palliative Care services across UHN</li> <li>• Describe perceptions of palliative care in Canada</li> <li>• Discuss the similarities/differences between the healthcare settings in Toronto and the fellows' own settings</li> </ul>                                                                                                                                |
| 3. Patient-Physician Communication                                       | <ul style="list-style-type: none"> <li>• Demonstrate communication skills (physician-patient) in palliative care consultation</li> <li>• Develop confidence in dealing with strong emotions (anger and sadness)</li> </ul>                                                                                                                                                                                                                                                                                                                     |
| 4. Advance Care Planning                                                 | <ul style="list-style-type: none"> <li>• Define the concepts of advance care planning, informed consent and goals of care</li> <li>• Describe how substitute decision maker(s) are defined in Ontario</li> <li>• Identify the components of goals of care discussion</li> </ul>                                                                                                                                                                                                                                                                |
| 5. Working in a Team-Based Environment                                   | <ul style="list-style-type: none"> <li>• Identify challenges international medical graduates face in Canada</li> <li>• Describe egalitarian and hierarchical workplace culture</li> <li>• Explain how hierarchical/egalitarian workplace culture relates to taking initiatives and receiving feedback</li> <li>• Reflect on one's ability to take initiative, give feedback and receive feedback</li> <li>• Describe how the interprofessional team operates at UHN</li> <li>• Demonstrate giving constructive or negative feedback</li> </ul> |

|                                                                          |                                                                                                                                                                                                                                                                       |
|--------------------------------------------------------------------------|-----------------------------------------------------------------------------------------------------------------------------------------------------------------------------------------------------------------------------------------------------------------------|
| 6. Bioethics and Patient Safety                                          | <ul style="list-style-type: none"><li>• Describe ethical principles along with Ontario laws and policies relevant to medical practice in palliative and end of life care</li><li>• Describe the overarching elements of safety within the healthcare system</li></ul> |
| 7. Social Determinants of Health                                         | <ul style="list-style-type: none"><li>• List the twelve key determinants of health that affect an individual's illness and end of life experience</li><li>• Recognize the specific palliative care needs of marginalized or vulnerable groups</li></ul>               |
| 8. Clinical Documentation and Palliative Care Setup and Resources at UHN | <ul style="list-style-type: none"><li>• Describe how the palliative care program was implemented at the University Health Network (UHN)</li><li>• Describe the enablers and barriers for early integration of palliative care</li></ul>                               |

**Table S2. Baseline characteristics of Online Bridging Program participants.**

| Characteristic                                    | N=9; n (%) |
|---------------------------------------------------|------------|
| <b>Age group (years)</b>                          |            |
| 30-39                                             | 8 (88.9)   |
| 40-49                                             | 1 (11.1)   |
| <b>Gender</b>                                     |            |
| Male                                              | 3 (33.3)   |
| Female                                            | 6 (66.7)   |
| <b>Years in practice</b>                          |            |
| 5 years or less                                   | 5 (55.6)   |
| 6 to 10 years                                     | 4 (44.4)   |
| <b>Medical specialty</b>                          |            |
| Family medicine                                   | 2 (22.2)   |
| Internal medicine                                 | 1 (11.1)   |
| Medical oncology                                  | 3 (33.3)   |
| Palliative medicine                               | 3 (33.3)   |
| <b>Region of medical training</b>                 |            |
| Asia                                              | 3 (33.3)   |
| Africa                                            | 1 (11.1)   |
| Europe                                            | 4 (44.4)   |
| North America                                     | 1 (11.1)   |
| <b>Prior level of training in Palliative Care</b> |            |
| None                                              | 1 (8.3)    |
| Clinical rotations                                | 4 (33.3)   |
| Continuing medical education                      | 3 (25.0)   |
| Formal palliative care training                   | 3 (25.0)   |
| Other                                             | 1 (8.3)    |
