# Supplementary material
Source: HighWire-hosted journal article supplement (https://spcare.bmj.com/content/bmjspcare-2020-002797)

**SUPPLEMENTARY FIGURE:****Figure S1. Participant responses to the survey.**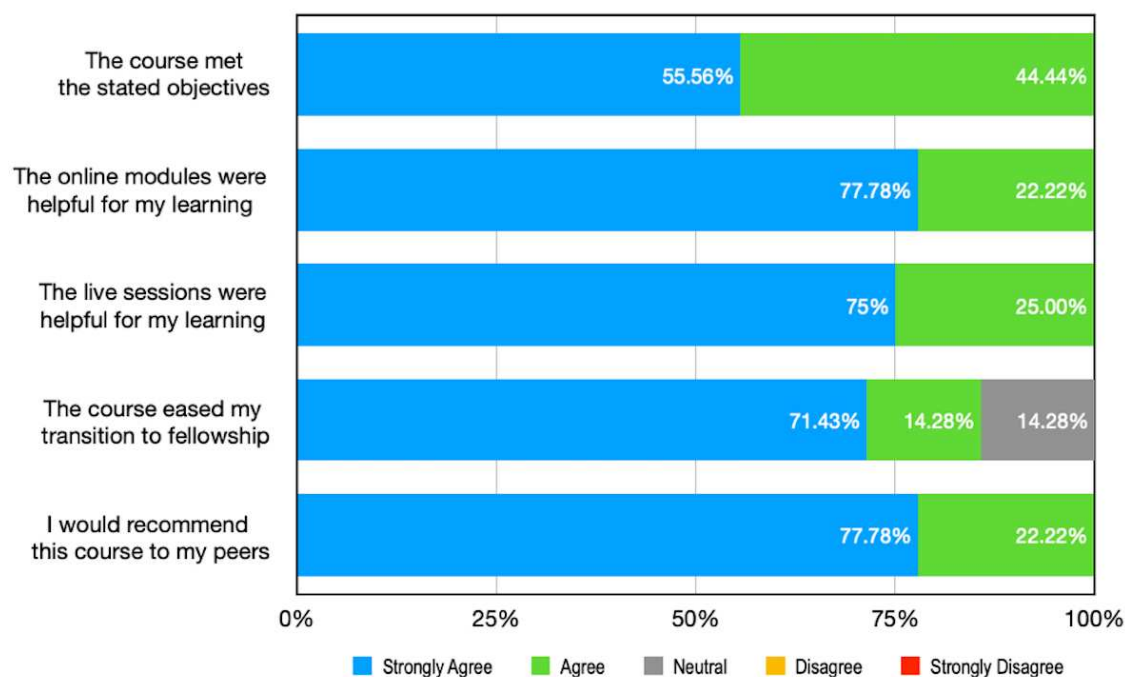

Supplement: inline-supplementary-material-2 [file inline-supplementary-material-2.pdf]
